# Supplementary material for: SLC1A3 knockdown in inhibiting the proliferation, apoptosis resistance, and migration of ovarian cancer cells
Source: PubMed Central journal article supplement — Transl Cancer Res. 2024 Nov 27;13(11):6315–22. doi: 10.21037/tcr-24-1909 (PMC11651795; doi:10.21037/tcr-24-1909), 2024-11-27
Supplement: tcr-13-11-6315-dss.pdf [file tcr-13-11-6315-dss.pdf]

## Data Sharing Statement

|                     |                                                                                                                                                     |                                                                                                                 |
|---------------------|-----------------------------------------------------------------------------------------------------------------------------------------------------|-----------------------------------------------------------------------------------------------------------------|
| <b>Article Info</b> | <a href="https://dx.doi.org/10.21037/tcr-24-1909">https://dx.doi.org/10.21037/tcr-24-1909</a>                                                       |                                                                                                                 |
| <b>Item</b>         | <b>Question</b>                                                                                                                                     | <b>Authors' Response<br/>(place "-" if not applicable)</b>                                                      |
| 1                   | Would you like to share data collected for your study to others?                                                                                    | No.                                                                                                             |
| 2                   | If not, would you like to share the reason for your decision?                                                                                       | -                                                                                                               |
| 3                   | What data in particular will be shared?                                                                                                             | -                                                                                                               |
| 4                   | Any other documents will be shared? Such as study protocol, statistical analysis plan, informed consent form, clinical study report, analytic code. | Study protocol.                                                                                                 |
| 5                   | When will data availability begin?                                                                                                                  | After being published.                                                                                          |
| 6                   | When will data availability end?                                                                                                                    | Within one year of the article's publication.                                                                   |
| 7                   | To whom will you share the data?                                                                                                                    | Researchers who are interested in this study.                                                                   |
| 8                   | For what type of analysis or purpose?                                                                                                               | For reference only.                                                                                             |
| 9                   | How or where can the data/documents be obtained?                                                                                                    | Please contact the corresponding author through e-mail 18694098396@163.com or xiongyanqiang@163.com             |
| 10                  | Any other restrictions?                                                                                                                             | We may balance the potential benefits and risks for each request and then provide the data that could be shared |
